# Supplementary material for: Investigating the Connection between Chronic Periodontitis and Parkinson’s Disease: Findings from a Korean National Cohort Study
Source: MDPI journal article supplement (doi:10.3390/biomedicines12040792), 2024-04-03
Supplement: s1 [file s1]

**Supplementary Table S1.** Crude and adjusted odd ratios of chronic periodontitis (CP) for Parkinson's disease (PD) when participants are diagnosed with CP  $\geq 2$  within 1 year before index date.

|                                                  | N of AD             | N of Control          | Odd ratios for PD (95% confidence interval) |        |                  |        |                  |        |
|--------------------------------------------------|---------------------|-----------------------|---------------------------------------------|--------|------------------|--------|------------------|--------|
|                                                  | (exposure/total, %) | (exposure/total, %)   | Crude†                                      | p      | Model 1†‡        | p      | Model 2†§        | p      |
| Total (n = 43,970)                               |                     |                       |                                             |        |                  |        |                  |        |
| No CP                                            | 8109/8794 (92.2%)   | 32,416/35,176 (92.2%) | 1                                           |        | 1                |        | 1                |        |
| CP ≥ 2                                           | 685/8794 (7.8%)     | 2760/35,176 (7.9%)    | 0.99 (0.91–1.08)                            | 0.858  | 0.99 (0.90–1.08) | 0.782  | 1.00 (0.91–1.09) | 0.937  |
| Age < 65 years old (n = 8380)                    |                     |                       |                                             |        |                  |        |                  |        |
| No CP                                            | 1549/1676 (92.4%)   | 6087/6704 (90.8%)     | 1                                           |        | 1                |        | 1                |        |
| CP ≥ 2                                           | 127/1676 (7.6%)     | 617/6704 (9.2%)       | 0.81 (0.66–0.99)                            | 0.037* | 0.81 (0.66–0.99) | 0.039* | 0.81 (0.66–0.99) | 0.037* |
| Age ≥ 65 years old (n = 35,590)                  |                     |                       |                                             |        |                  |        |                  |        |
| No CP                                            | 6560/7118 (92.2%)   | 26,329/28,472 (92.5%) | 1                                           |        | 1                |        | 1                |        |
| CP ≥ 2                                           | 558/7118 (7.8%)     | 2143/28,472 (7.5%)    | 1.05 (0.95–1.15)                            | 0.368  | 1.06 (0.96–1.16) | 0.273  | 1.05 (0.95–1.16) | 0.345  |
| Men (n = 21,020)                                 |                     |                       |                                             |        |                  |        |                  |        |
| No CP                                            | 3834/4204 (91.2%)   | 15,352/16,816 (91.3%) | 1                                           |        | 1                |        | 1                |        |
| CP ≥ 2                                           | 370/4204 (8.8%)     | 1464/16,816 (8.7%)    | 1.01 (0.90–1.14)                            | 0.845  | 1.02 (0.91–1.16) | 0.696  | 1.02 (0.91–1.16) | 0.704  |
| Women (n = 22,950)                               |                     |                       |                                             |        |                  |        |                  |        |
| No CP                                            | 4275/4590 (93.1%)   | 17,064/18,360 (92.9%) | 1                                           |        | 1                |        | 1                |        |
| CP ≥ 2                                           | 315/4590 (6.9%)     | 1296/18,360 (7.1%)    | 0.97 (0.85–1.10)                            | 0.645  | 0.98 (0.86–1.11) | 0.707  | 0.96 (0.84–1.09) | 0.544  |
| Low income (n = 18,740)                          |                     |                       |                                             |        |                  |        |                  |        |
| No CP                                            | 3495/3748 (93.3%)   | 13,906/14,992 (92.8%) | 1                                           |        | 1                |        | 1                |        |
| CP ≥ 2                                           | 253/3748 (6.8%)     | 1086/14,992 (7.2%)    | 0.93 (0.80–1.07)                            | 0.294  | 0.94 (0.81–1.08) | 0.363  | 0.94 (0.81–1.08) | 0.377  |
| High income (n = 25,230)                         |                     |                       |                                             |        |                  |        |                  |        |
| No CP                                            | 4614/5046 (91.4%)   | 18,510/20,184 (91.7%) | 1                                           |        | 1                |        | 1                |        |
| CP ≥ 2                                           | 432/5046 (8.6%)     | 1674/20,184 (8.3%)    | 1.04 (0.93–1.16)                            | 0.535  | 1.04 (0.93–1.17) | 0.451  | 1.03 (0.92–1.15) | 0.608  |
| Urban residents (n = 16,630)                     |                     |                       |                                             |        |                  |        |                  |        |
| No CP                                            | 3035/3326 (91.3%)   | 12,058/13,304 (90.6%) | 1                                           |        | 1                |        | 1                |        |
| CP ≥ 2                                           | 291/3326 (8.8%)     | 1246/13,304 (9.4%)    | 0.93 (0.81–1.06)                            | 0.272  | 0.94 (0.82–1.07) | 0.345  | 0.93 (0.81–1.07) | 0.309  |
| Rural residents (n = 27,340)                     |                     |                       |                                             |        |                  |        |                  |        |
| No CP                                            | 5074/5468 (92.8%)   | 20,358/21,872 (93.1%) | 1                                           |        | 1                |        | 1                |        |
| CP ≥ 2                                           | 394/5468 (7.2%)     | 1514/21,872 (6.9%)    | 1.04 (0.93–1.17)                            | 0.457  | 1.05 (0.94–1.18) | 0.390  | 1.04 (0.93–1.17) | 0.488  |
| Underweight (n = 1617)                           |                     |                       |                                             |        |                  |        |                  |        |
| No CP                                            | 301/318 (94.7%)     | 1229/1299 (94.6%)     | 1                                           |        | 1                |        | 1                |        |
| CP ≥ 2                                           | 17/318 (5.4%)       | 70/1299 (5.4%)        | 0.99 (0.58–1.71)                            | 0.976  | 1.00 (0.58–1.74) | 0.990  | 1.04 (0.60–1.82) | 0.887  |
| Normal weight (n = 15,612)                       |                     |                       |                                             |        |                  |        |                  |        |
| No CP                                            | 2838/3098 (91.6%)   | 11,579/12,514 (92.5%) | 1                                           |        | 1                |        | 1                |        |
| CP ≥ 2                                           | 260/3098 (8.4%)     | 935/12,514 (7.5%)     | 1.13 (0.98–1.31)                            | 0.085  | 1.14 (0.99–1.32) | 0.069  | 1.13 (0.98–1.31) | 0.091  |
| Overweight (n = 11,480)                          |                     |                       |                                             |        |                  |        |                  |        |
| No CP                                            | 2135/2308 (92.5%)   | 8413/9172 (91.7%)     | 1                                           |        | 1                |        | 1                |        |
| CP ≥ 2                                           | 173/2308 (7.5%)     | 759/9172 (8.3%)       | 0.90 (0.76–1.07)                            | 0.221  | 0.90 (0.76–1.07) | 0.253  | 0.91 (0.77–1.09) | 0.309  |
| Obese (n = 15,261)                               |                     |                       |                                             |        |                  |        |                  |        |
| No CP                                            | 2835/3070 (92.4%)   | 11,195/12,191 (91.8%) | 1                                           |        | 1                |        | 1                |        |
| CP ≥ 2                                           | 235/3070 (7.7%)     | 996/12,191 (8.2%)     | 0.93 (0.80–1.08)                            | 0.349  | 0.94 (0.81–1.10) | 0.447  | 0.92 (0.79–1.07) | 0.281  |
| Non-smoker (n = 32,525)                          |                     |                       |                                             |        |                  |        |                  |        |
| No CP                                            | 6267/6765 (92.6%)   | 23,827/25,760 (92.5%) | 1                                           |        | 1                |        | 1                |        |
| CP ≥ 2                                           | 498/6765 (7.4%)     | 1933/25,760 (7.5%)    | 0.98 (0.88–1.09)                            | 0.693  | 0.98 (0.88–1.08) | 0.647  | 0.97 (0.87–1.07) | 0.520  |
| Past smoker and current smoker (n = 11,445)      |                     |                       |                                             |        |                  |        |                  |        |
| No CP                                            | 1842/2029 (90.8%)   | 8589/9416 (91.2%)     | 1                                           |        | 1                |        | 1                |        |
| CP ≥ 2                                           | 187/2029 (9.2%)     | 827/9416 (8.8%)       | 1.05 (0.89–1.25)                            | 0.533  | 1.07 (0.91–1.27) | 0.399  | 1.07 (0.90–1.27) | 0.433  |
| Alcohol consumption < 1 time a week (n = 29,626) |                     |                       |                                             |        |                  |        |                  |        |
| No CP                                            | 5756/6243 (92.2%)   | 21,617/23,383 (92.5%) | 1                                           |        | 1                |        | 1                |        |

|                                                  |                   |                       |                  |       |                  |       |                  |        |
|--------------------------------------------------|-------------------|-----------------------|------------------|-------|------------------|-------|------------------|--------|
| CP ≥ 2                                           | 487/6243 (7.8%)   | 1766/23,383 (7.6%)    | 1.04 (0.93–1.15) | 0.507 | 1.03 (0.93–1.15) | 0.554 | 1.02 (0.92–1.14) | 0.660  |
| Alcohol consumption ≥ 1 time a week (n = 14,344) |                   |                       |                  |       |                  |       |                  |        |
| No CP                                            | 2353/2551 (92.2%) | 10,799/11,793 (91.6%) | 1                |       | 1                |       | 1                |        |
| CP ≥ 2                                           | 198/2551 (7.8%)   | 994/11,793 (8.4%)     | 0.91 (0.78–1.07) | 0.269 | 0.93 (0.79–1.09) | 0.384 | 0.93 (0.79–1.09) | 0.371  |
| SBP < 140 mmHg and DBP < 90 mmHg (n = 30,124)    |                   |                       |                  |       |                  |       |                  |        |
| No CP                                            | 5216/5669 (92%)   | 22,452/24,455 (91.8%) | 1                |       | 1                |       | 1                |        |
| CP ≥ 2                                           | 453/5669 (8%)     | 2003/24,455 (8.2%)    | 0.97 (0.88–1.08) | 0.623 | 0.99 (0.89–1.10) | 0.789 | 0.98 (0.88–1.09) | 0.730  |
| SBP ≥ 140 mmHg or DBP ≥ 90 mmHg (n = 13,846)     |                   |                       |                  |       |                  |       |                  |        |
| No CP                                            | 2893/3125 (92.6%) | 9964/10,721 (92.9%)   | 1                |       | 1                |       | 1                |        |
| CP ≥ 2                                           | 232/3125 (7.4%)   | 757/10,721 (7.1%)     | 1.06 (0.91–1.23) | 0.488 | 1.05 (0.90–1.22) | 0.553 | 1.04 (0.89–1.21) | 0.660  |
| Fasting blood glucose < 100 mg/dL (n = 24,375)   |                   |                       |                  |       |                  |       |                  |        |
| No CP                                            | 4261/4613 (92.4%) | 18,220/19,762 (92.2%) | 1                |       | 1                |       | 1                |        |
| CP ≥ 2                                           | 352/4613 (7.6%)   | 1542/19,762 (7.8%)    | 0.98 (0.87–1.10) | 0.696 | 0.98 (0.87–1.11) | 0.764 | 0.98 (0.87–1.11) | 0.804  |
| Fasting blood glucose ≥ 100 mg/dL (n = 19,595)   |                   |                       |                  |       |                  |       |                  |        |
| No CP                                            | 3848/4181 (92%)   | 14,196/15,414 (92.1%) | 1                |       | 1                |       | 1                |        |
| CP ≥ 2                                           | 333/4181 (8%)     | 1218/15,414 (7.9%)    | 1.01 (0.89–1.14) | 0.894 | 1.02 (0.90–1.16) | 0.766 | 1.00 (0.88–1.14) | 0.991  |
| Total cholesterol < 200mg/dL (n = 25,115)        |                   |                       |                  |       |                  |       |                  |        |
| No CP                                            | 4769/5169 (92.3%) | 18,368/19,946 (92.1%) | 1                |       | 1                |       | 1                |        |
| CP ≥ 2                                           | 400/5169 (7.7%)   | 1578/19,946 (7.9%)    | 0.98 (0.87–1.09) | 0.683 | 0.98 (0.88–1.10) | 0.769 | 0.98 (0.87–1.10) | 0.678  |
| Total cholesterol ≥ 200mg/dL (n = 18,855)        |                   |                       |                  |       |                  |       |                  |        |
| No CP                                            | 3340/3625 (92.1%) | 14,048/15,230 (92.2%) | 1                |       | 1                |       | 1                |        |
| CP ≥ 2                                           | 285/3625 (7.9%)   | 1182/15,230 (7.8%)    | 1.01 (0.89–1.16) | 0.838 | 1.03 (0.90–1.18) | 0.662 | 1.02 (0.89–1.17) | 0.737  |
| CCI score = 0 (n = 19,473)                       |                   |                       |                  |       |                  |       |                  |        |
| No CP                                            | 2458/2649 (92.8%) | 15,437/16,824 (91.8%) | 1                |       | 1                |       | 1                |        |
| CP ≥ 2                                           | 191/2649 (7.2%)   | 1387/16,824 (8.2%)    | 1.01 (0.89–1.16) | 0.838 | 1.03 (0.90–1.18) | 0.662 | 0.85 (0.72–0.99) | 0.040* |
| CCI score = 1 (n = 8885)                         |                   |                       |                  |       |                  |       |                  |        |
| No CP                                            | 1872/2030 (92.2%) | 6335/6855 (92.4%)     | 1                |       | 1                |       | 1                |        |
| CP ≥ 2                                           | 158/2030 (7.8%)   | 520/6855 (7.6%)       | 1.03 (0.85–1.24) | 0.767 | 1.01 (0.84–1.22) | 0.931 | 1.01 (0.84–1.22) | 0.897  |
| CCI score ≥ 2 (n = 15,612)                       |                   |                       |                  |       |                  |       |                  |        |
| No CP                                            | 3779/4115 (91.8%) | 10,644/11,497 (92.6%) | 1                |       | 1                |       | 1                |        |
| CP ≥ 2                                           | 336/4115 (8.2%)   | 853/11,497 (7.4%)     | 1.11 (0.97–1.27) | 0.122 | 1.11 (0.97–1.27) | 0.121 | 1.11 (0.97–1.27) | 0.129  |

Abbreviations: CP, chronic periodontitis; PD, Parkinson's disease; SBP, systolic blood pressure; DBP, diastolic blood pressure; CCI, Charlson Comorbidity Index.

\* Conditional or unconditional logistic regression analysis, Significance at  $p < 0.05$ .

† Stratified model for age, sex, income, and region of residence.

‡ Model 1 was adjusted for smoking, alcohol consumption, obesity and CCI scores.

§ Model 2 was adjusted for model 1 plus total cholesterol, systolic blood pressure, diastolic blood pressure, and fasting blood glucose.

**Supplementary Table S2.** Crude and adjusted odd ratios of chronic periodontitis (CP) for Parkinson's disease (PD) when participants are diagnosed with CP  $\geq 3$  within 1 year before index date.

|                                                  | N of PD             | N of Control          | Odd ratios for PD (95% confidence interval) |        |                  |        |                  |        |  |
|--------------------------------------------------|---------------------|-----------------------|---------------------------------------------|--------|------------------|--------|------------------|--------|--|
|                                                  | (exposure/total, %) | (exposure/total, %)   | Crude†                                      | p      | Model 1†‡        | p      | Model 2†§        | p      |  |
| Total (n = 43,970)                               |                     |                       |                                             |        |                  |        |                  |        |  |
| No CP                                            | 8395/8794 (95.5%)   | 33,671/35,176 (95.7%) | 1                                           |        | 1                |        | 1                |        |  |
| CP ≥ 3                                           | 399/8794 (4.5%)     | 1505/35,176 (4.3%)    | 1.06 (0.95–1.19)                            | 0.285  | 1.05 (0.94–1.18) | 0.360  | 1.06 (0.95–1.19) | 0.314  |  |
| Age < 65 years old (n = 8380)                    |                     |                       |                                             |        |                  |        |                  |        |  |
| No CP                                            | 1601/1676 (95.5%)   | 6378/6704 (95.1%)     | 1                                           |        | 1                |        | 1                |        |  |
| CP ≥ 3                                           | 75/1676 (4.5%)      | 326/6704 (4.9%)       | 0.92 (0.71–1.18)                            | 0.506  | 0.91 (0.71–1.18) | 0.495  | 0.90 (0.70–1.17) | 0.452  |  |
| Age ≥ 65 years old (n = 35,590)                  |                     |                       |                                             |        |                  |        |                  |        |  |
| No CP                                            | 6794/7118 (95.5%)   | 27,293/28,472 (95.9%) | 1                                           |        | 1                |        | 1                |        |  |
| CP ≥ 3                                           | 324/7118 (4.6%)     | 1179/28,472 (4.1%)    | 1.10 (0.97–1.25)                            | 0.123  | 1.11 (0.98–1.26) | 0.106  | 1.10 (0.97–1.25) | 0.145  |  |
| Men (n = 21,020)                                 |                     |                       |                                             |        |                  |        |                  |        |  |
| No CP                                            | 3980/4204 (94.7%)   | 15,987/16,816 (95.1%) | 1                                           |        | 1                |        | 1                |        |  |
| CP ≥ 3                                           | 224/4204 (5.3%)     | 829/16,816 (4.9%)     | 1.09 (0.93–1.26)                            | 0.290  | 1.09 (0.94–1.27) | 0.256  | 1.09 (0.93–1.27) | 0.275  |  |
| Women (n = 22,950)                               |                     |                       |                                             |        |                  |        |                  |        |  |
| No CP                                            | 4415/4590 (96.2%)   | 17,684/18,360 (96.3%) | 1                                           |        | 1                |        | 1                |        |  |
| CP ≥ 3                                           | 175/4590 (3.8%)     | 676/18,360 (3.7%)     | 1.04 (0.88–1.23)                            | 0.672  | 1.04 (0.88–1.23) | 0.662  | 1.02 (0.86–1.21) | 0.827  |  |
| Low income (n = 18,740)                          |                     |                       |                                             |        |                  |        |                  |        |  |
| No CP                                            | 3593/3748 (95.9%)   | 14,413/14,992 (96.1%) | 1                                           |        | 1                |        | 1                |        |  |
| CP ≥ 3                                           | 155/3748 (4.1%)     | 579/14,992 (3.9%)     | 1.07 (0.90–1.29)                            | 0.440  | 1.08 (0.90–1.30) | 0.402  | 1.07 (0.89–1.29) | 0.441  |  |
| High income (n = 25,230)                         |                     |                       |                                             |        |                  |        |                  |        |  |
| No CP                                            | 4802/5046 (95.2%)   | 19,258/20,184 (95.4%) | 1                                           |        | 1                |        | 1                |        |  |
| CP ≥ 3                                           | 244/5046 (4.8%)     | 926/20,184 (4.6%)     | 1.06 (0.91–1.22)                            | 0.454  | 1.06 (0.92–1.23) | 0.430  | 1.04 (0.90–1.21) | 0.559  |  |
| Urban residents (n = 16,630)                     |                     |                       |                                             |        |                  |        |                  |        |  |
| No CP                                            | 3139/3326 (94.4%)   | 12,601/13,304 (94.7%) | 1                                           |        | 1                |        | 1                |        |  |
| CP ≥ 3                                           | 187/3326 (5.6%)     | 703/13,304 (5.3%)     | 1.07 (0.90–1.26)                            | 0.438  | 1.07 (0.91–1.27) | 0.411  | 1.06 (0.90–1.26) | 0.480  |  |
| Rural residents (n = 27,340)                     |                     |                       |                                             |        |                  |        |                  |        |  |
| No CP                                            | 5256/5468 (96.1%)   | 21,070/21,872 (96.3%) | 1                                           |        | 1                |        | 1                |        |  |
| CP ≥ 3                                           | 212/5468 (3.9%)     | 802/21,872 (3.7%)     | 1.06 (0.91–1.24)                            | 0.462  | 1.06 (0.91–1.24) | 0.437  | 1.05 (0.90–1.23) | 0.545  |  |
| Underweight (n = 1617)                           |                     |                       |                                             |        |                  |        |                  |        |  |
| No CP                                            | 311/318 (97.8%)     | 1257/1299 (96.8%)     | 1                                           |        | 1                |        | 1                |        |  |
| CP ≥ 3                                           | 7/318 (2.2%)        | 42/1299 (3.2%)        | 0.67 (0.30–1.51)                            | 0.340  | 0.71 (0.31–1.59) | 0.402  | 0.74 (0.33–1.69) | 0.479  |  |
| Normal weight (n = 15,612)                       |                     |                       |                                             |        |                  |        |                  |        |  |
| No CP                                            | 2944/3098 (95.0%)   | 12,003/12,514 (95.9%) | 1                                           |        | 1                |        | 1                |        |  |
| CP ≥ 3                                           | 154/3098 (5.0%)     | 511/12,514 (4.1%)     | 1.23 (1.02–1.48)                            | 0.029* | 1.22 (1.01–1.47) | 0.036* | 1.21 (1.01–1.46) | 0.044* |  |
| Overweight (n = 11,480)                          |                     |                       |                                             |        |                  |        |                  |        |  |
| No CP                                            | 2202/2308 (95.4%)   | 8753/9172 (95.4%)     | 1                                           |        | 1                |        | 1                |        |  |
| CP ≥ 3                                           | 106/2308 (4.6%)     | 419/9172 (4.6%)       | 1.01 (0.81–1.25)                            | 0.960  | 1.01 (0.81–1.26) | 0.916  | 1.01 (0.81–1.26) | 0.920  |  |
| Obese (n = 15,261)                               |                     |                       |                                             |        |                  |        |                  |        |  |
| No CP                                            | 2938/3070 (95.7%)   | 11,658/12,191 (95.6%) | 1                                           |        | 1                |        | 1                |        |  |
| CP ≥ 3                                           | 132/3070 (4.3%)     | 533/12,191 (4.4%)     | 0.98 (0.81–1.19)                            | 0.861  | 0.99 (0.82–1.21) | 0.945  | 0.97 (0.79–1.18) | 0.733  |  |
| Non-smoker (n = 32,525)                          |                     |                       |                                             |        |                  |        |                  |        |  |
| No CP                                            | 6478/6765 (95.8%)   | 24,731/25,760 (96%)   | 1                                           |        | 1                |        | 1                |        |  |
| CP ≥ 3                                           | 287/6765 (4.2%)     | 1029/25,760 (4.0%)    | 1.06 (0.93–1.22)                            | 0.357  | 1.05 (0.92–1.21) | 0.442  | 1.04 (0.91–1.19) | 0.563  |  |
| Past smoker and current smoker (n = 11,445)      |                     |                       |                                             |        |                  |        |                  |        |  |
| No CP                                            | 1917/2029 (94.5%)   | 8940/9416 (94.9%)     | 1                                           |        | 1                |        | 1                |        |  |
| CP ≥ 3                                           | 112/2029 (5.5%)     | 476/9416 (5.1%)       | 1.10 (0.89–1.36)                            | 0.390  | 1.11 (0.89–1.37) | 0.356  | 1.09 (0.88–1.36) | 0.414  |  |
| Alcohol consumption < 1 time a week (n = 29,626) |                     |                       |                                             |        |                  |        |                  |        |  |

|                                                  |                   |                       |                  |        |                  |        |                  |        |
|--------------------------------------------------|-------------------|-----------------------|------------------|--------|------------------|--------|------------------|--------|
| No CP                                            | 2445/2551 (95.8%) | 11,223/11,793 (95.2%) | 1                |        | 1                |        | 1                |        |
| CP ≥ 3                                           | 106/2551 (4.2%)   | 570/11,793 (4.8%)     | 1.18 (1.03–1.35) | 0.015* | 1.17 (1.02–1.34) | 0.024* | 1.15 (1.01–1.32) | 0.042* |
| Alcohol consumption ≥ 1 time a week (n = 14,344) |                   |                       |                  |        |                  |        |                  |        |
| No CP                                            | 5406/5669 (95.4%) | 23,369/24,455 (95.6%) | 1                |        | 1                |        | 1                |        |
| CP ≥ 3                                           | 263/5669 (4.6%)   | 1086/24,455 (4.4%)    | 0.85 (0.69–1.06) | 0.143  | 0.87 (0.70–1.07) | 0.189  | 0.87 (0.70–1.08) | 0.197  |
| SBP < 140 mmHg and DBP < 90 mmHg (n = 30,124)    |                   |                       |                  |        |                  |        |                  |        |
| No CP                                            | 2989/3125 (95.7%) | 10,302/10,721 (96.1%) | 1                |        | 1                |        | 1                |        |
| CP ≥ 3                                           | 136/3125 (4.4%)   | 419/10,721 (3.9%)     | 1.05 (0.91–1.20) | 0.510  | 1.05 (0.92–1.21) | 0.452  | 1.05 (0.91–1.20) | 0.524  |
| SBP ≥ 140 mmHg or DBP ≥ 90 mmHg (n = 13,846)     |                   |                       |                  |        |                  |        |                  |        |
| No CP                                            | 4409/4613 (95.6%) | 18,947/19,762 (95.9%) | 1                |        | 1                |        | 1                |        |
| CP ≥ 3                                           | 204/4613 (4.4%)   | 815/19,762 (4.1%)     | 1.12 (0.92–1.36) | 0.266  | 1.09 (0.89–1.33) | 0.387  | 1.07 (0.88–1.31) | 0.488  |
| Fasting blood glucose < 100 mg/dL (n = 24,375)   |                   |                       |                  |        |                  |        |                  |        |
| No CP                                            | 4409/4613 (95.6%) | 18,947/19,762 (95.9%) | 1                |        | 1                |        | 1                |        |
| CP ≥ 3                                           | 204/4613 (4.4%)   | 815/19,762 (4.1%)     | 1.08 (0.92–1.26) | 0.362  | 1.08 (0.92–1.27) | 0.333  | 1.09 (0.93–1.27) | 0.309  |
| Fasting blood glucose ≥ 100 mg/dL (n = 19,595)   |                   |                       |                  |        |                  |        |                  |        |
| No CP                                            | 3986/4181 (95.3%) | 14,724/15,414 (95.5%) | 1                |        | 1                |        | 1                |        |
| CP ≥ 3                                           | 195/4181 (4.7%)   | 690/15,414 (4.5%)     | 1.04 (0.89–1.23) | 0.601  | 1.05 (0.89–1.24) | 0.540  | 1.02 (0.87–1.21) | 0.776  |
| Total cholesterol < 200mg/dL (n = 25,115)        |                   |                       |                  |        |                  |        |                  |        |
| No CP                                            | 4935/5169 (95.5%) | 19,069/19,946 (95.6%) | 1                |        | 1                |        | 1                |        |
| CP ≥ 3                                           | 234/5169 (4.5%)   | 877/19,946 (4.4%)     | 1.03 (0.89–1.20) | 0.683  | 1.04 (0.90–1.21) | 0.604  | 1.03 (0.89–1.20) | 0.708  |
| Total cholesterol ≥ 200mg/dL (n = 18,855)        |                   |                       |                  |        |                  |        |                  |        |
| No CP                                            | 3460/3625 (95.5%) | 14,602/15,230 (95.9%) | 1                |        | 1                |        | 1                |        |
| CP ≥ 3                                           | 165/3625 (4.6%)   | 628/15,230 (4.1%)     | 1.11 (0.93–1.32) | 0.248  | 1.12 (0.94–1.34) | 0.204  | 1.11 (0.93–1.33) | 0.251  |
| CCI score = 0 (n = 19,473)                       |                   |                       |                  |        |                  |        |                  |        |
| No CP                                            | 2552/2649 (96.3%) | 16,074/16,824 (95.5%) | 1                |        | 1                |        | 1                |        |
| CP ≥ 3                                           | 97/2649 (3.7%)    | 750/16,824 (4.5%)     | 0.81 (0.66–1.01) | 0.062  | 0.80 (0.65–1.00) | 0.046* | 0.81 (0.65–1.00) | 0.049* |
| CCI score = 1 (n = 8885)                         |                   |                       |                  |        |                  |        |                  |        |
| No CP                                            | 1935/2030 (95.3%) | 6582/6855 (96.0%)     | 1                |        | 1                |        | 1                |        |
| CP ≥ 3                                           | 95/2030 (4.7%)    | 273/6855 (4.0%)       | 1.18 (0.93–1.50) | 0.167  | 1.17 (0.92–1.49) | 0.203  | 1.17 (0.92–1.49) | 0.207  |
| CCI score ≥ 2 (n = 15,612)                       |                   |                       |                  |        |                  |        |                  |        |
| No CP                                            | 3908/4115 (95.0%) | 11,015/11,497 (95.8%) | 1                |        | 1                |        | 1                |        |
| CP ≥ 3                                           | 207/4115 (5.0%)   | 482/11,497 (4.2%)     | 1.21 (1.02–1.43) | 0.025* | 1.20 (1.02–1.42) | 0.032* | 1.20 (1.01–1.42) | 0.034* |

Abbreviations: CP, chronic periodontitis; PD, Parkinson's disease; SBP, systolic blood pressure; DBP, diastolic blood pressure; CCI, Charlson Comorbidity Index.

\* Conditional or unconditional logistic regression analysis, Significance at  $p < 0.05$ .

† Stratified model for age, sex, income, and region of residence.

‡ Model 1 was adjusted for smoking, alcohol consumption, obesity and CCI scores.

§ Model 2 was adjusted for model 1 plus total cholesterol, systolic blood pressure, diastolic blood pressure, and fasting blood glucose.

**Supplementary Table S3.** Crude and adjusted odd ratios of chronic periodontitis (CP) for Parkinson's disease (PD) when participants are diagnosed with CP  $\geq 1$  within 2 years before index date.

|                                                  | N of PD                 | N of Control          | Odd ratios for PD (95% confidence interval) |          |                  |          |                  |          |
|--------------------------------------------------|-------------------------|-----------------------|---------------------------------------------|----------|------------------|----------|------------------|----------|
|                                                  | (exposure/total, %<br>) | (exposure/total, %)   | Crude†                                      | <i>p</i> | Model 1†‡        | <i>p</i> | Model 2†§        | <i>p</i> |
| Total (n = 43,970)                               |                         |                       |                                             |          |                  |          |                  |          |
| No CP                                            | 6415/8794 (73.0%)       | 25,743/35,176 (73.2%) | 1                                           |          | 1                |          | 1                |          |
| CP ≥ 1                                           | 2379/8794 (27.1%)       | 9433/35,176 (26.8%)   | 1.01 (0.96–1.07)                            | 0.653    | 1.01 (0.96–1.07) | 0.727    | 1.02 (0.96–1.07) | 0.573    |
| Age < 65 years old (n = 8380)                    |                         |                       |                                             |          |                  |          |                  |          |
| No CP                                            | 1177/1676 (70.2%)       | 4660/6704 (69.5%)     | 1                                           |          | 1                |          | 1                |          |
| CP ≥ 1                                           | 499/1676 (29.8%)        | 2044/6704 (30.5%)     | 0.97 (0.86–1.09)                            | 0.570    | 0.97 (0.86–1.09) | 0.557    | 0.98 (0.87–1.10) | 0.730    |
| Age ≥ 65 years old (n = 35,590)                  |                         |                       |                                             |          |                  |          |                  |          |
| No CP                                            | 5238/7118 (73.6%)       | 21,083/28,472 (74.1%) | 1                                           |          | 1                |          | 1                |          |
| CP ≥ 1                                           | 1880/7118 (26.4%)       | 7389/28,472 (26.0%)   | 1.02 (0.97–1.09)                            | 0.427    | 1.03 (0.97–1.10) | 0.305    | 1.02 (0.97–1.09) | 0.422    |
| Men (n = 21,020)                                 |                         |                       |                                             |          |                  |          |                  |          |
| No CP                                            | 2983/4204 (71%)         | 11,984/16,816 (71.3%) | 1                                           |          | 1                |          | 1                |          |
| CP ≥ 1                                           | 1221/4204 (29%)         | 4832/16,816 (28.7%)   | 1.02 (0.94–1.09)                            | 0.692    | 1.03 (0.96–1.11) | 0.431    | 1.03 (0.95–1.11) | 0.478    |
| Women (n = 22,950)                               |                         |                       |                                             |          |                  |          |                  |          |
| No CP                                            | 3432/4590 (74.8%)       | 13,759/18,360 (74.9%) | 1                                           |          | 1                |          | 1                |          |
| CP ≥ 1                                           | 1158/4590 (25.2%)       | 4601/18,360 (25.1%)   | 1.01 (0.94–1.09)                            | 0.813    | 1.01 (0.93–1.09) | 0.865    | 1.00 (0.93–1.08) | 0.998    |
| Low income (n = 18,740)                          |                         |                       |                                             |          |                  |          |                  |          |
| No CP                                            | 2781/3748 (74.2%)       | 11,189/14,992 (74.6%) | 1                                           |          | 1                |          | 1                |          |
| CP ≥ 1                                           | 967/3748 (25.8%)        | 3803/14,992 (25.4%)   | 1.02 (0.94–1.11)                            | 0.585    | 1.03 (0.95–1.12) | 0.508    | 1.02 (0.94–1.11) | 0.608    |
| High income (n = 25,230)                         |                         |                       |                                             |          |                  |          |                  |          |
| No CP                                            | 3634/5046 (72.0%)       | 14,554/20,184 (72.1%) | 1                                           |          | 1                |          | 1                |          |
| CP ≥ 1                                           | 1412/5046 (28.0%)       | 5630/20,184 (27.9%)   | 1.00 (0.94–1.08)                            | 0.899    | 1.01 (0.94–1.08) | 0.772    | 1.01 (0.94–1.08) | 0.870    |
| Urban residents (n = 16,630)                     |                         |                       |                                             |          |                  |          |                  |          |
| No CP                                            | 2338/3326 (70.3%)       | 9301/13,304 (69.9%)   | 1                                           |          | 1                |          | 1                |          |
| CP ≥ 1                                           | 988/3326 (29.7%)        | 4003/13,304 (30.1%)   | 0.98 (0.90–1.07)                            | 0.667    | 0.99 (0.91–1.08) | 0.861    | 0.99 (0.91–1.08) | 0.870    |
| Rural residents (n = 27,340)                     |                         |                       |                                             |          |                  |          |                  |          |
| No CP                                            | 4077/5468 (74.6%)       | 16,442/21,872 (75.2%) | 1                                           |          | 1                |          | 1                |          |
| CP ≥ 1                                           | 1391/5468 (25.4%)       | 5430/21,872 (24.8%)   | 1.03 (0.97–1.11)                            | 0.347    | 1.04 (0.97–1.11) | 0.314    | 1.03 (0.96–1.10) | 0.445    |
| Underweight (n = 1617)                           |                         |                       |                                             |          |                  |          |                  |          |
| No CP                                            | 237/318 (74.5%)         | 1023/1299 (78.8%)     | 1                                           |          | 1                |          | 1                |          |
| CP ≥ 1                                           | 81/318 (25.5%)          | 276/1299 (21.3%)      | 1.27 (0.95–1.68)                            | 0.104    | 1.23 (0.92–1.65) | 0.154    | 1.24 (0.92–1.66) | 0.157    |
| Normal weight (n = 15,612)                       |                         |                       |                                             |          |                  |          |                  |          |
| No CP                                            | 2271/3098 (73.3%)       | 9262/12,514 (74.0%)   | 1                                           |          | 1                |          | 1                |          |
| CP ≥ 1                                           | 827/3098 (26.7%)        | 3252/12,514 (26.0%)   | 1.04 (0.95–1.13)                            | 0.420    | 1.04 (0.95–1.14) | 0.379    | 1.04 (0.95–1.14) | 0.387    |
| Overweight (n = 11,480)                          |                         |                       |                                             |          |                  |          |                  |          |
| No CP                                            | 1669/2308 (72.3%)       | 6619/9172 (72.2%)     | 1                                           |          | 1                |          | 1                |          |
| CP ≥ 1                                           | 639/2308 (27.7%)        | 2553/9172 (27.8%)     | 0.99 (0.90–1.10)                            | 0.887    | 1.00 (0.90–1.11) | 0.973    | 1.01 (0.91–1.12) | 0.868    |
| Obese (n = 15,261)                               |                         |                       |                                             |          |                  |          |                  |          |
| No CP                                            | 2238/3070 (72.9%)       | 8839/12,191 (72.5%)   | 1                                           |          | 1                |          | 1                |          |
| CP ≥ 1                                           | 832/3070 (27.1%)        | 3352/12,191 (27.5%)   | 0.98 (0.90–1.07)                            | 0.662    | 0.99 (0.90–1.08) | 0.782    | 0.97 (0.88–1.06) | 0.476    |
| Non-smoker (n = 32,525)                          |                         |                       |                                             |          |                  |          |                  |          |
| No CP                                            | 4995/6765 (73.8%)       | 18,980/25,760 (73.7%) | 1                                           |          | 1                |          | 1                |          |
| CP ≥ 1                                           | 1770/6765 (26.2%)       | 6780/25,760 (26.3%)   | 0.99 (0.93–1.05)                            | 0.796    | 0.98 (0.93–1.05) | 0.615    | 0.98 (0.92–1.04) | 0.534    |
| Past smoker and current smoker (n = 11,445)      |                         |                       |                                             |          |                  |          |                  |          |
| No CP                                            | 1420/2029 (70.0%)       | 6763/9416 (71.8%)     | 1                                           |          | 1                |          | 1                |          |
| CP ≥ 1                                           | 609/2029 (30.0%)        | 2653/9416 (28.2%)     | 1.09 (0.98–1.21)                            | 0.096    | 1.12 (1.00–1.24) | 0.044    | 1.11 (1.00–1.24) | 0.053    |
| Alcohol consumption < 1 time a week (n = 29,626) |                         |                       |                                             |          |                  |          |                  |          |

|                                                  |                   |                       |                  |        |                  |        |                  |        |
|--------------------------------------------------|-------------------|-----------------------|------------------|--------|------------------|--------|------------------|--------|
| No CP                                            | 4617/6243 (74%)   | 17,454/23,383 (74.6%) | 1                |        | 1                |        | 1                |        |
| CP ≥ 1                                           | 1626/6243 (26.1%) | 5929/23,383 (25.4%)   | 1.04 (0.97–1.11) | 0.265  | 1.03 (0.97–1.10) | 0.367  | 1.02 (0.95–1.09) | 0.611  |
| Alcohol consumption ≥ 1 time a week (n = 14,344) |                   |                       |                  |        |                  |        |                  |        |
| No CP                                            | 1798/2551 (70.5%) | 8289/11,793 (70.3%)   | 1                |        | 1                |        | 1                |        |
| CP ≥ 1                                           | 753/2551 (29.5%)  | 3504/11,793 (29.7%)   | 0.99 (0.90–1.09) | 0.845  | 1.01 (0.92–1.11) | 0.835  | 1.00 (0.91–1.10) | 0.947  |
| SBP < 140 mmHg and DBP < 90 mmHg (n = 30,124)    |                   |                       |                  |        |                  |        |                  |        |
| No CP                                            | 4108/5669 (72.5%) | 17,673/24,455 (72.3%) | 1                |        | 1                |        | 1                |        |
| CP ≥ 1                                           | 1561/5669 (27.5%) | 6782/24,455 (27.7%)   | 0.99 (0.93–1.06) | 0.766  | 0.99 (0.93–1.06) | 0.783  | 0.99 (0.92–1.05) | 0.686  |
| SBP ≥ 140 mmHg or DBP ≥ 90 mmHg (n = 13,846)     |                   |                       |                  |        |                  |        |                  |        |
| No CP                                            | 2307/3125 (73.8%) | 8070/10,721 (75.3%)   | 1                |        | 1                |        | 1                |        |
| CP ≥ 1                                           | 818/3125 (26.2%)  | 2651/10,721 (24.7%)   | 1.08 (0.99–1.18) | 0.100  | 1.08 (0.99–1.19) | 0.094  | 1.08 (0.98–1.18) | 0.116  |
| Fasting blood glucose < 100 mg/dL (n = 24,375)   |                   |                       |                  |        |                  |        |                  |        |
| No CP                                            | 3376/4613 (73.2%) | 14,499/19,762 (73.4%) | 1                |        | 1                |        | 1                |        |
| CP ≥ 1                                           | 1237/4613 (26.8%) | 5263/19,762 (26.6%)   | 1.01 (0.94–1.09) | 0.799  | 1.02 (0.95–1.09) | 0.633  | 1.02 (0.95–1.10) | 0.556  |
| Fasting blood glucose ≥ 100 mg/dL (n = 19,595)   |                   |                       |                  |        |                  |        |                  |        |
| No CP                                            | 3039/4181 (72.7%) | 11,244/15,414 (73%)   | 1                |        | 1                |        | 1                |        |
| CP ≥ 1                                           | 1142/4181 (27.3%) | 4170/15,414 (27.1%)   | 1.01 (0.94–1.09) | 0.736  | 1.02 (0.94–1.10) | 0.675  | 1.00 (0.92–1.08) | 0.994  |
| Total cholesterol < 200mg/dL (n = 25,115)        |                   |                       |                  |        |                  |        |                  |        |
| No CP                                            | 3738/5169 (72.3%) | 14,579/19,946 (73.1%) | 1                |        | 1                |        | 1                |        |
| CP ≥ 1                                           | 1431/5169 (27.7%) | 5367/19,946 (26.9%)   | 1.04 (0.97–1.11) | 0.260  | 1.04 (0.97–1.12) | 0.252  | 1.04 (0.97–1.12) | 0.268  |
| Total cholesterol ≥ 200mg/dL (n = 18,855)        |                   |                       |                  |        |                  |        |                  |        |
| No CP                                            | 2677/3625 (73.9%) | 11,164/15,230 (73.3%) | 1                |        | 1                |        | 1                |        |
| CP ≥ 1                                           | 948/3625 (26.2%)  | 4066/15,230 (26.7%)   | 0.97 (0.90–1.06) | 0.506  | 0.98 (0.91–1.07) | 0.697  | 0.97 (0.89–1.06) | 0.513  |
| CCI score = 0 (n = 19,473)                       |                   |                       |                  |        |                  |        |                  |        |
| No CP                                            | 1966/2649 (74.2%) | 12,180/16,824 (72.4%) | 1                |        | 1                |        | 1                |        |
| CP ≥ 1                                           | 683/2649 (25.8%)  | 4644/16,824 (27.6%)   | 0.91 (0.83–1.00) | 0.051  | 0.90 (0.82–0.99) | 0.024* | 0.90 (0.82–0.99) | 0.027* |
| CCI score = 1 (n = 8885)                         |                   |                       |                  |        |                  |        |                  |        |
| No CP                                            | 1486/2030 (73.2%) | 5034/6855 (73.4%)     | 1                |        | 1                |        | 1                |        |
| CP ≥ 1                                           | 544/2030 (26.8%)  | 1821/6855 (26.6%)     | 1.01 (0.90–1.13) | 0.834  | 1.00 (0.89–1.12) | 0.976  | 1.00 (0.89–1.12) | 0.980  |
| CCI score ≥ 2 (n = 15,612)                       |                   |                       |                  |        |                  |        |                  |        |
| No CP                                            | 2963/4115 (72.0%) | 8529/11,497 (74.2%)   | 1                |        | 1                |        | 1                |        |
| CP ≥ 1                                           | 1152/4115 (28.0%) | 2968/11,497 (25.8%)   | 1.12 (1.03–1.21) | 0.007* | 1.11 (1.02–1.20) | 0.012* | 1.11 (1.02–1.20) | 0.012* |

Abbreviations: CP, chronic periodontitis; PD, Parkinson's disease; SBP, systolic blood pressure; DBP, diastolic blood pressure; CCI, Charlson Comorbidity Index.

\* Conditional or unconditional logistic regression analysis, Significance at  $p < 0.05$ .

† Stratified model for age, sex, income, and region of residence.

‡ Model 1 was adjusted for smoking, alcohol consumption, obesity and CCI scores.

§ Model 2 was adjusted for model 1 plus total cholesterol, systolic blood pressure, diastolic blood pressure, and fasting blood glucose.
